# Supplementary material for: The application of low frequency dielectric spectroscopy to analyze the electrorheological behavior of monodisperse yolk–shell SiO2/TiO2 nanospheres
Source: Royal Society of Chemistry journal article supplement (doi:10.1039/c5sm02024g), 2015-10-19
Supplement: c5sm02024g1.pdf [file c5sm02024g1.pdf]

## The Application of Low Frequency Dielectric Spectroscopy to Analyze Electrorheological Behavior of Monodisperse Yolk-Shell SiO<sub>2</sub>/TiO<sub>2</sub> Nanospheres

Xiaosong Guo, Yulu Chen, Dong Li, Guicun Li, Meng Xin, Mei Zhao, Chen Yang, Chunheng Hao\*, Qingquan Lei

*Laboratory of Functional and Biological Nanomaterials, College of Materials Science and Engineering, Qingdao University of  
Science and Technology, Qingdao, China.*

*Corresponding Author: clx@qust.edu.cn; Fax: 86-532-84022814; Tel: 86-532-84022632*

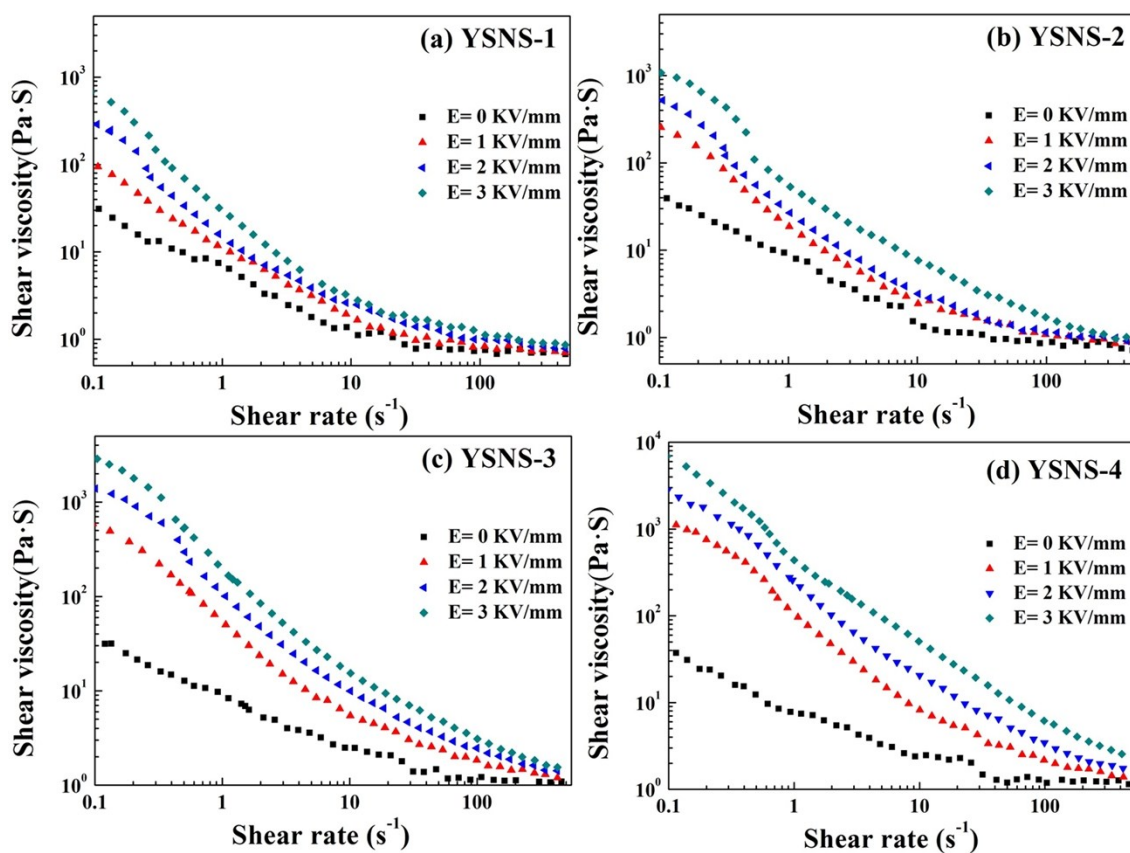

**Fig. S1** Shear viscosity versus shear rate for (a) YSNS-1, (b) YSNS-2, (c) YSNS-3, (d) YSNS-4 based ERF under different electric field strength.

Fig. S1 shows the shear viscosity curves of various YSNS-based fluids under different electric field strengths. Under an external electric field, the shear viscosity rapidly decreased with increasing shear rate, demonstrating the typical shear thinning phenomenon of a solid-like property. It was also confirmed that under the same condition, the shear viscosity was raised as the silica core size decreased due to the increased flow resistance between the materials. Meanwhile, the decrease of shear viscosity as a function of shear rate approximately follows the relation:

$$\eta \propto \dot{\gamma}^a$$

where  $a$  is equal to 1.0 within the wide shear rate region. However, the shear viscosity curves began to fluctuate at low shear rate. This fluctuating region (shear rate  $< 1.0 \text{ s}^{-1}$ ) was depicted as formation and deformation of fibril-like structure due to alternative domination of inter-particle force and hydrodynamic force.<sup>1</sup>

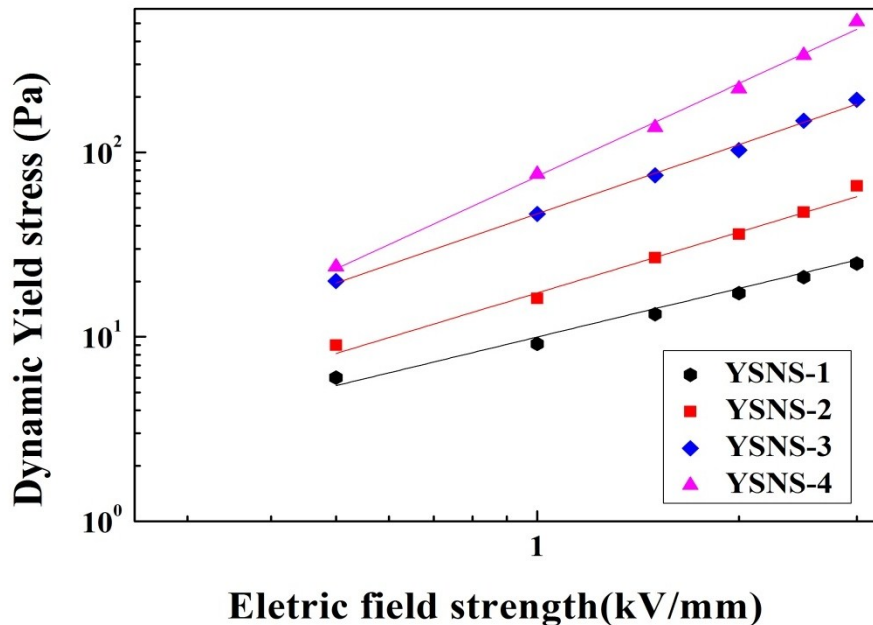

**Fig. S2** Dynamic yield stress of the various YSNS based ER fluid as a function of the electric field.

The dynamic yield stress of the various YSNS based ER fluid was obtained by extrapolating the shear stress to a zero shear rate limit, which was also considered to be the shear stress at the starting shear rate.<sup>2</sup>

## REFERENCES

1. X. L. Tian, Y. C. Yin, B. X. Wang, X. F. Song, S. S. Sun, S. S. Yu, C. C. Hao and K. Z. Chen, *Eur. J. Inorg. Chem.*, 2015, **3**, 430-440.
2. Y. D. Liu, X. M. Quan, B. Hwang, Y. K. Kwon and H. J. Choi, *Langmuir*, 2014, **30**, 1729-1734.
